# Supplementary material for: The first metamagnetic one-dimensional molecular material with nickel(ii) and end-to-end azido bridges
Source: Royal Society of Chemistry journal article supplement (doi:10.1039/b104649g), 2001-01-01
Supplement: b104649g1.doc [file b104649g1.doc]

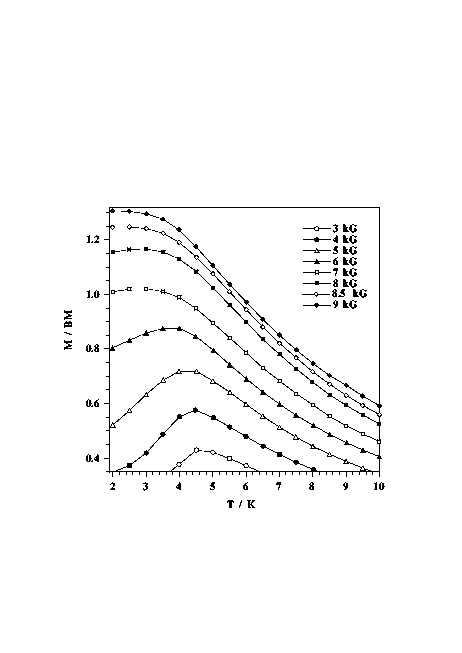
The magnetization (M) versus temperature (T) curves at different magnetic field show that the maximum exist only for applied fields less than 7 kG.
