# Supplementary material for: The first metamagnetic one-dimensional molecular material with nickel(ii) and end-to-end azido bridges
Source: Royal Society of Chemistry journal article supplement (doi:10.1039/b104649g), 2001-01-01
Supplement: b104649g2.doc [file b104649g2.doc]

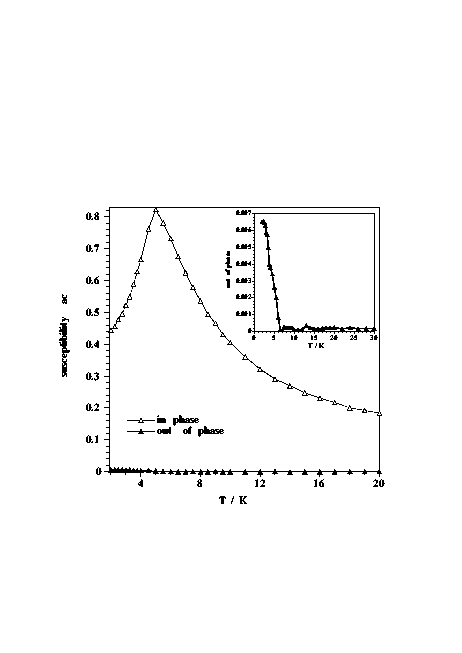
This figure indicates an out-of-phase signal (AC measurements) occurs at ca. 5 K. In-phase (open triangle) and out-of-phase (filled triangle).
